# Supplementary material
Source: PubMed Central journal article supplement (PMC1856215)
Supplement: gut_2005.084574_1.pdf [file gut_2005.084574_1.pdf]

**Table 5: Results of case only logistic regression analysis for OCTN variant IGR 2230 and CD site / behaviour.**

| CD sub-phenotype group             | IGR2230 Genotype | CD cases with sub-phenotype n (%) | CD cases without sub-phenotype n (%) | Case only allelic odds ratios assuming multiplicative model comparing sub-phenotype group to all other CD cases |             |       |
|------------------------------------|------------------|-----------------------------------|--------------------------------------|-----------------------------------------------------------------------------------------------------------------|-------------|-------|
|                                    |                  |                                   |                                      | OR                                                                                                              | 95% CI      | P     |
| Ileal disease (L1)                 | CC               | 32 (21.6)                         | 73 (21.1)                            | 0.98                                                                                                            | [0.74-1.29] | 0.87  |
|                                    | CT               | 78 (52.7)                         | 182 (52.6)                           |                                                                                                                 |             |       |
|                                    | TT               | 38 (25.7)                         | 91 (26.3)                            |                                                                                                                 |             |       |
| Colonic disease (L2)               | CC               | 30 (20.1)                         | 75 (21.7)                            | 1.06                                                                                                            | [0.80-1.40] | 0.69  |
|                                    | CT               | 79 (53.0)                         | 181 (52.5)                           |                                                                                                                 |             |       |
|                                    | TT               | 40 (26.9)                         | 89 (25.8)                            |                                                                                                                 |             |       |
| Ileo-colonic disease (L3)          | CC               | 41 (22.2)                         | 64 (20.7)                            | 0.98                                                                                                            | [0.75-1.28] | 0.89  |
|                                    | CT               | 95 (51.4)                         | 165 (53.4)                           |                                                                                                                 |             |       |
|                                    | TT               | 49 (25.9)                         | 94 (26.5)                            |                                                                                                                 |             |       |
| Peri-anal disease                  | CC               | 24 (18.9)                         | 81 (22.1)                            | 1.04                                                                                                            | [0.78-1.40] | 0.78  |
|                                    | CT               | 71 (55.9)                         | 189 (51.5)                           |                                                                                                                 |             |       |
|                                    | TT               | 32 (25.2)                         | 97 (26.4)                            |                                                                                                                 |             |       |
| Inflammatory behaviour (B1)        | CC               | 44 (21.9)                         | 61 (20.8)                            | 1.08                                                                                                            | [0.83-1.40] | 0.57  |
|                                    | CT               | 99 (49.3)                         | 161 (55.0)                           |                                                                                                                 |             |       |
|                                    | TT               | 58 (28.9)                         | 71 (24.2)                            |                                                                                                                 |             |       |
| Stenosing behaviour (B2)           | CC               | 41 (22.9)                         | 64 (20.5)                            | 0.93                                                                                                            | [0.71-1.21] | 0.61  |
|                                    | CT               | 92 (51.4)                         | 166 (53.0)                           |                                                                                                                 |             |       |
|                                    | TT               | 46 (25.6)                         | 83 (26.5)                            |                                                                                                                 |             |       |
| Penetrating behaviour (B3)         | CC               | 20 (17.2)                         | 85 (22.5)                            | 0.98                                                                                                            | [0.72-1.33] | 0.92  |
|                                    | CT               | 71 (61.2)                         | 189 (50.0)                           |                                                                                                                 |             |       |
|                                    | TT               | 25 (21.6)                         | 104 (27.5)                           |                                                                                                                 |             |       |
| Proven Internal Fistulae / abscess | CC               | 14 (20.9)                         | 91 (21.3)                            | 0.89                                                                                                            | [0.61-1.29] | 0.533 |
|                                    | CT               | 39 (58.2)                         | 221 (51.8)                           |                                                                                                                 |             |       |
|                                    | TT               | 14 (20.9)                         | 115 (26.9)                           |                                                                                                                 |             |       |

CD behaviour classified according to the Vienna classification[28]. Patients were classified in either fistulating or stenosing groups depending on the form of disease behaviour considered primary. Patients in the inflammatory group had neither fistulating nor stenosing disease. Peri-anal disease and proven internal fistulae / abscesses were also considered separately.
